# Supplementary figures and images for: Enhanced xylitol production using non-detoxified xylose rich pre-hydrolysate from sugarcane bagasse by newly isolated Pichia fermentans
Source: Research Square preprint supplement (doi:10.21203/rs.3.rs-45506/v3), 2020-11-18

**Graphical Abstract**


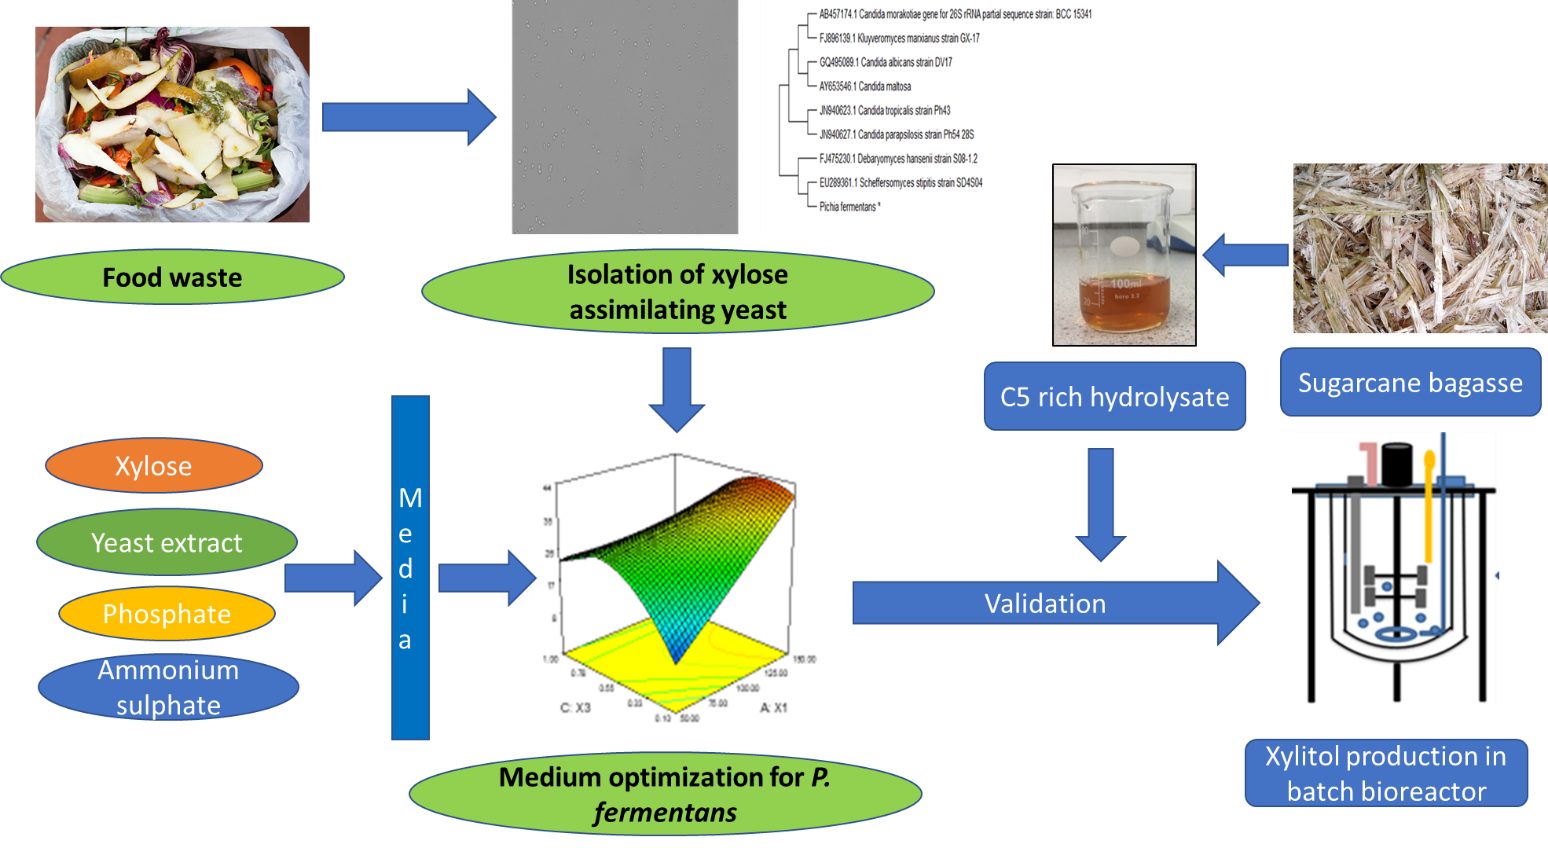

Supplement: Supplementary file 1 [file 51e515b22ca5f0c1ea741bdd.docx]
